# Supplementary material for: The DMT1 IVS4+44C>A polymorphism and the risk of iron deficiency anemia in children with celiac disease
Source: PubMed Central journal article supplement (PMC5638269; doi:10.1371/journal.pone.0185822), 2017-10-12
Supplement: pone.0185822.s005.pdf [file pone.0185822.s005.pdf]

## S1 File

### DMT1 IVS+44C>A polymorphism is associated to iron deficiency anemia in celiac disease

#### A

##### Increased risk for presenting anemia in celiac DMT1 IVS+44 A-allele carriers

|                | AA+CA     | CC        | <i>chi-square</i> | <i>df</i> | <i>p-value</i> | <i>Odds Ratio</i> | <i>95% LCL</i> | <i>95% UCL</i> |
|----------------|-----------|-----------|-------------------|-----------|----------------|-------------------|----------------|----------------|
| <b>IDA</b>     | 91 (40%)  | 43 (27%)  | 4.812             | 1         | <b>0.006</b>   | <b>1.85</b>       | 1.19           | 2.87           |
| <b>non-IDA</b> | 135 (60%) | 118 (63%) |                   |           |                |                   |                |                |

#### B

##### Increased risk for presenting anemia in celiac DMT1 IVS+44 homozygous AA carriers

|                | AA       | CA+CC     | <i>chi-square</i> | <i>df</i> | <i>p-value</i> | <i>Odds Ratio</i> | <i>95% LCL</i> | <i>95% UCL</i> |
|----------------|----------|-----------|-------------------|-----------|----------------|-------------------|----------------|----------------|
| <b>IDA</b>     | 21 (64%) | 113 (32%) | 13.414            | 1         | <b>0.0002</b>  | <b>3.73</b>       | 1.77           | 7.85           |
| <b>non-IDA</b> | 12 (36%) | 241 (68%) |                   |           |                |                   |                |                |

Abbreviations: df, degrees of freedom; LCL, lower confidence limit; UCL, upper confidence limit; IDA, iron deficiency anemia.  $p < 0.05$  has been considered significant.
