# Supplementary material for: The DMT1 IVS4+44C>A polymorphism and the risk of iron deficiency anemia in children with celiac disease
Source: PubMed Central journal article supplement (PMC5638269; doi:10.1371/journal.pone.0185822), 2017-10-12
Supplement: pone.0185822.s006.pdf [file pone.0185822.s006.pdf]

## S2 File

### Data analysis of total DMT1 expression in atrophic vs. non-atrophic biopsies

#### A

##### Data analysis of total DMT1 expression in T0 vs. T3b biopsies

|             | <b>T0</b> | <b>T3b</b> | <b>t</b> | <b>df</b> | <b>p</b>    |
|-------------|-----------|------------|----------|-----------|-------------|
| <b>N</b>    | 11        | 6          | 0.742    | 15        | <b>0.47</b> |
| <b>mean</b> | 2.77      | 2.52       |          |           |             |
| <b>SD</b>   | 0.17      | 1.13       |          |           |             |

#### B

##### Data analysis of total DMT1 expression in T0 vs. T3c biopsies

|             | <b>T0</b> | <b>T3c</b> | <b>t</b> | <b>df</b> | <b>p</b>    |
|-------------|-----------|------------|----------|-----------|-------------|
| <b>N</b>    | 11        | 7          | 1.03     | 16        | <b>0.32</b> |
| <b>mean</b> | 2.77      | 3.23       |          |           |             |
| <b>SD</b>   | 0.17      | 1.47       |          |           |             |

The t- test was used to analyze the difference of total DMT1 expression between non-atrophic (T0) duodenal biopsies with respect to T3b (A) or T3C (B) villous atrophy degree, by using the real-time derived  $\Delta C_t$  values ( $C_{t\text{ DMT1}} - C_{t\text{ } \beta\text{-actin}}$ ).

Abbreviations: df, degrees of freedom; SD, standard deviations.
