# Supplementary material for: The DMT1 IVS4+44C>A polymorphism and the risk of iron deficiency anemia in children with celiac disease
Source: PubMed Central journal article supplement (PMC5638269; doi:10.1371/journal.pone.0185822), 2017-10-12
Supplement: pone.0185822.s007.pdf [file pone.0185822.s007.pdf]

## S3 File

### Age-related association between iron deficiency anemia and gender in celiac

#### Italian children

##### A) Celiac children $\leq 4$ years old

|                | <b>M</b> | <b>F</b>   | <i>chi-square</i> | <i>df</i> | <i>p-value</i> | <i>Odds Ratio</i> | <i>95% LCL</i> | <i>95% UCL</i> |
|----------------|----------|------------|-------------------|-----------|----------------|-------------------|----------------|----------------|
| <b>IDA</b>     | 50 (57%) | 39 (32.5%) | 12.832            | 1         | <b>0.0003</b>  | <b>2.81</b>       | 1.58           | 4.97           |
| <b>non-IDA</b> | 37 (43%) | 81 (68.5%) |                   |           |                |                   |                |                |

##### B) Celiac children 11-18 years old

|                | <b>M</b> | <b>F</b> | <i>chi-square</i> | <i>df</i> | <i>p-value</i> |
|----------------|----------|----------|-------------------|-----------|----------------|
| <b>IDA</b>     | 17 (26%) | 28 (24%) | 0.072             | 1         | <b>0.79</b>    |
| <b>non-IDA</b> | 48 (74%) | 87 (76%) |                   |           |                |

##### C) Celiac children $> 4$ years old

|                | <b>M</b> | <b>F</b> | <i>chi-square</i> | <i>df</i> | <i>p-value</i> | <i>Odds Ratio</i> | <i>95% LCL</i> | <i>95% UCL</i> |
|----------------|----------|----------|-------------------|-----------|----------------|-------------------|----------------|----------------|
| <b>IDA</b>     | 2 (9%)   | 9 (45%)  | 7.406             | 1         | <b>0.006</b>   | <b>8.59</b>       | 1.57           | 46.88          |
| <b>non-IDA</b> | 21 (91%) | 11 (55%) |                   |           |                |                   |                |                |

Abbreviations: M, males; F, females; df, degrees of freedom; LCL, lower confidence limit; UCL, upper confidence limit; IDA, iron deficiency anemia.  $p < 0.05$  has been considered significant.
